# Supplementary material for: The Role of Family Health in Mediating the Association between Smartphone Use and Health Risk Behaviors among Chinese Adolescent Students: A National Cross-Sectional Study
Source: MDPI journal article supplement (doi:10.3390/ijerph192013378), 2022-10-17
Supplement: s1 [file s1]

**Table S1. Family Health Scale Short-form evaluation dimensions**

| <b>Dimension</b>                                    | <b>Items</b>                                                                                                                   |
|-----------------------------------------------------|--------------------------------------------------------------------------------------------------------------------------------|
| <b>Family Social and Emotional Health Processes</b> | In my family, we support each other.                                                                                           |
|                                                     | In my family, I feel safe in my family relationships.                                                                          |
|                                                     | In my family, we stay hopeful even in difficult times.                                                                         |
| <b>Family Healthy Lifestyle</b>                     | In my family, we help each other in seeking health care services when needed (such as making doctor's appointments).           |
|                                                     | In my family, we help each other make healthy changes.                                                                         |
| <b>Family Health Resources</b>                      | In my family, we do not trust doctors and other health professionals.                                                          |
|                                                     | In the past 12 months, my family did not have enough money at the end of the month after bills were paid.                      |
|                                                     | In the past 12 months, my family did not have adequate housing.                                                                |
| <b>Family External Social Supports</b>              | In my family, we have people outside of our family we can turn to when we have problems at school or work.                     |
|                                                     | In my family, if we needed financial help, we have people outside of our family we could turn to for a loan (e.g., for \$200). |

**Table S2. Adolescent Health Risk Behaviors Scale measure items**

| <b>Measure</b>                                                                             | <b>Items</b>                                                                                                  |
|--------------------------------------------------------------------------------------------|---------------------------------------------------------------------------------------------------------------|
| <b>How often did you do any of the following in the past 30 days?</b>                      | Non-compliance walking behavior (eg.,using phone while walking)                                               |
|                                                                                            | Swimming in unguarded water (swimming in rivers and reservoirs)                                               |
|                                                                                            | Non-compliance walking behavior (eg. running the red light)                                                   |
|                                                                                            | Not wearing seatbelt while riding                                                                             |
|                                                                                            | Eating unhygienic food (eg.,food that has been contaminated with bacteria and has undergone partial spoilage) |
|                                                                                            | leaving home                                                                                                  |
|                                                                                            | Subjected to physical violence                                                                                |
| <b>What was the age of first full exposure to addictive substances (tobacco, alcohol)?</b> | The age at which a cigarette was first smoked                                                                 |
|                                                                                            | The age of first alcohol consumption                                                                          |
